# Supplementary material for: Chemical Emissions from Cured and Uncured 3D-Printed Ventilator Patient Circuit Medical Parts
Source: PubMed Central journal article supplement — ACS Omega. 2021 Nov 8;6(45):30726–33. doi: 10.1021/acsomega.1c04695 (PMC8600644; doi:10.1021/acsomega.1c04695), 2021-11-08
Supplement: ao1c04695_si_001.pdf [file ao1c04695_si_001.pdf]

**Supporting Information for:**

**Chemical Emissions from Cured and Uncured 3D-Printed Ventilator Patient Circuit Medical Parts**

Authors:

Jordan E. Krechmer<sup>1,\*</sup>, Brennan Phillips<sup>2</sup>, Nicholas Chaloux<sup>2</sup>, Russell Shomberg<sup>2</sup>, Conner Daube<sup>1</sup>, Gaurav Manchanda<sup>3</sup>, Sam Murray<sup>3</sup>, Alex McCarthy<sup>3</sup>, Rodrigo Fonseca<sup>4,§</sup>, Jinen Thakkar<sup>5</sup>, Brice Loose<sup>2</sup>, Scott C. Herndon<sup>1</sup>, John T. Jayne<sup>1</sup>, Douglas R. Worsnop<sup>1</sup>, Manjula R. Canagaratna<sup>1</sup>

<sup>1</sup> Aerodyne Research, Inc., 45 Manning Road, Billerica, MA 01821, USA

<sup>2</sup> The University of Rhode Island, Department of Ocean Engineering, 215 South Ferry Road, Narragansett, RI 02882, USA

<sup>3</sup> Formlabs, Inc. 35 Medford Street, Somerville, MA 02143, USA

<sup>4</sup> Computer Science Department, Brown University, Providence RI 02903, USA

<sup>5</sup> Department of Medicine, Brown University and Alpert Medical School, Providence RI 02903, USA

Contents:

Figure S1-S5

Table S1

Corresponding author:

\*Jordan E. Krechmer

Aerodyne Research, Inc., Billerica, MA 01821

Phone: 978 633-9500

[krechmer@aerodyne.com](mailto:krechmer@aerodyne.com)

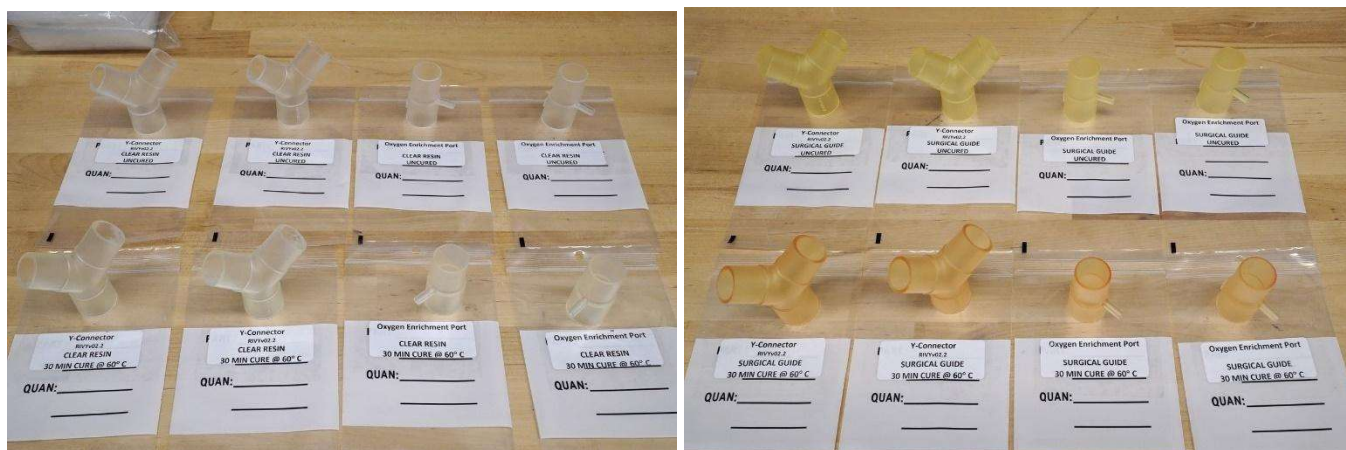

Figure S1: 3D-printed parts used in the second round of measurements. Each photo shows 2 oxygen enrichment ports and 2 flow splitters made from different resin and cure types. The photo on the left shows parts printed using the standard Clear resin. Starting from the top left part and going around clockwise, the captions read: Y-connector, clear resin uncured; Y-connector, clear resin, uncured; oxygen enrichment port, clear resin, uncured; oxygen enrichment port, clear resin, uncured; oxygen enrichment port, clear resin, 30 min cure @ 60 C; oxygen enrichment port, clear resin, 30 min cure @ 60 C; Y-connector, clear resin, 30 min cure @ 60 C; Y-connector, clear resin, 30 min cure @ 60 C. The photo on the right shows parts printed using the Surgical Guide resin. From the top left part going clockwise the captions read: Y-connector, surgical guide, uncured; Y-connector, surgical guide, uncured; oxygen enrichment port, surgical guide, uncured; oxygen enrichment port, surgical guide, uncured; oxygen enrichment port, surgical guide, 30 min cure @ 60 C; oxygen enrichment port, surgical guide, 30 min cure @ 60 C; Y-connector, surgical guide, 30 min cure @ 60 C; Y-connector, surgical guide, 30 min cure @ 60 C. The photos were taken by the authors.

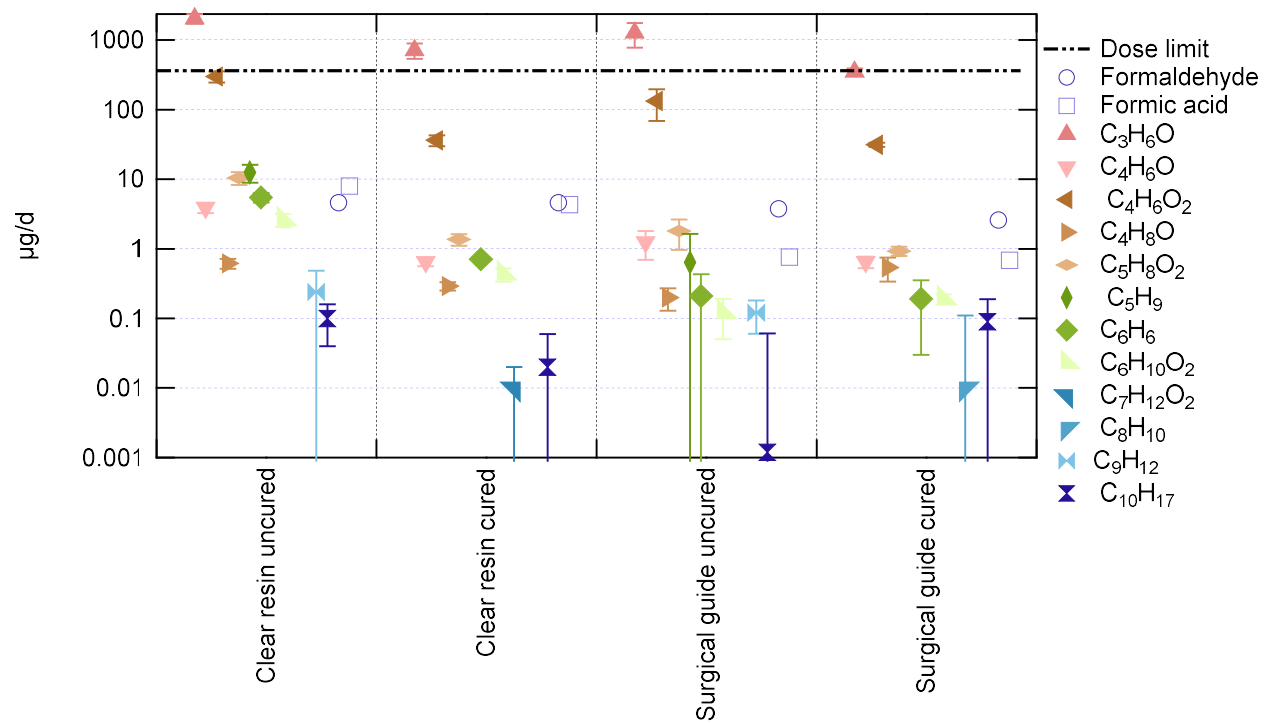

Figure S2: Emission factors for 3D printed oxygen enrichment ports in units of micrograms per day ( $\mu\text{g/d}$ ). Emissions are plotted with a dose limit of  $360 \mu\text{g/d}$  as recommended by ISO 18562-3:2017.

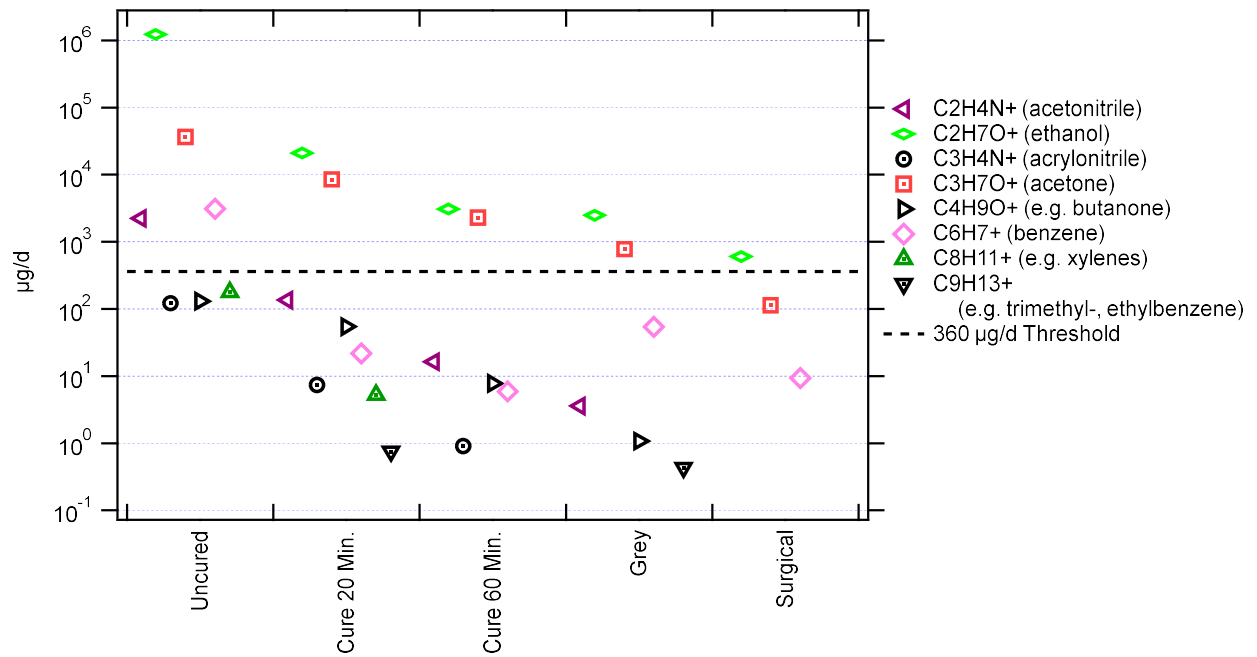

Figure S3: Measurements of additional resins and curing types, including an uncured clear resin part, a clear resin part with shorter 20 minute and 60 minute curing times, an alternative grey resin, and the surgical guide resin. The grey resin and surgical guide resin were uncured.

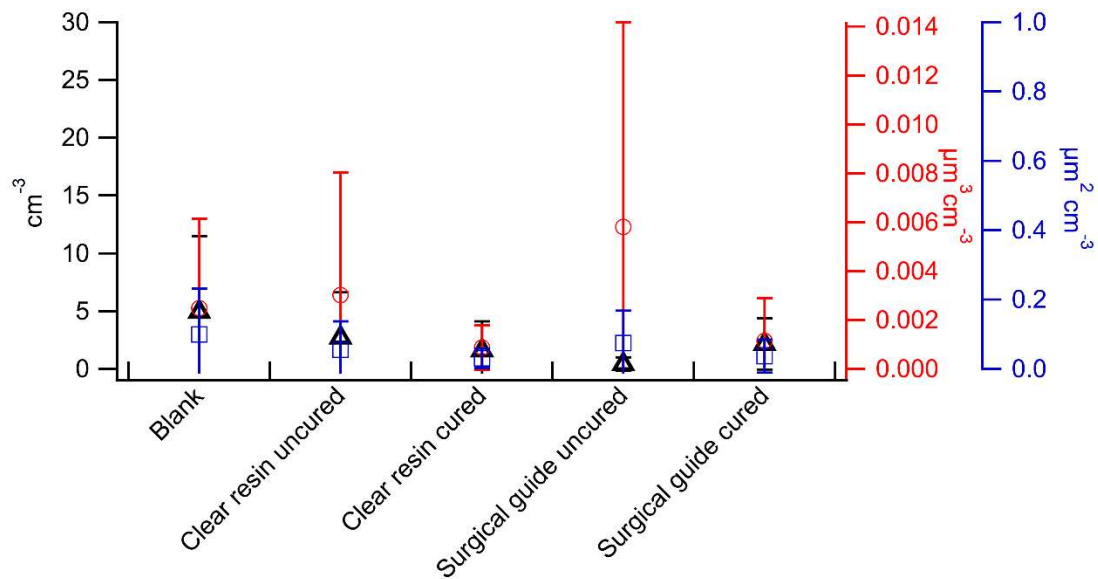

Figure S4: SMPS-measurements of particle number concentration, volume, and surface area of 3D printed parts. All are at or less than the value of the analytical blank.

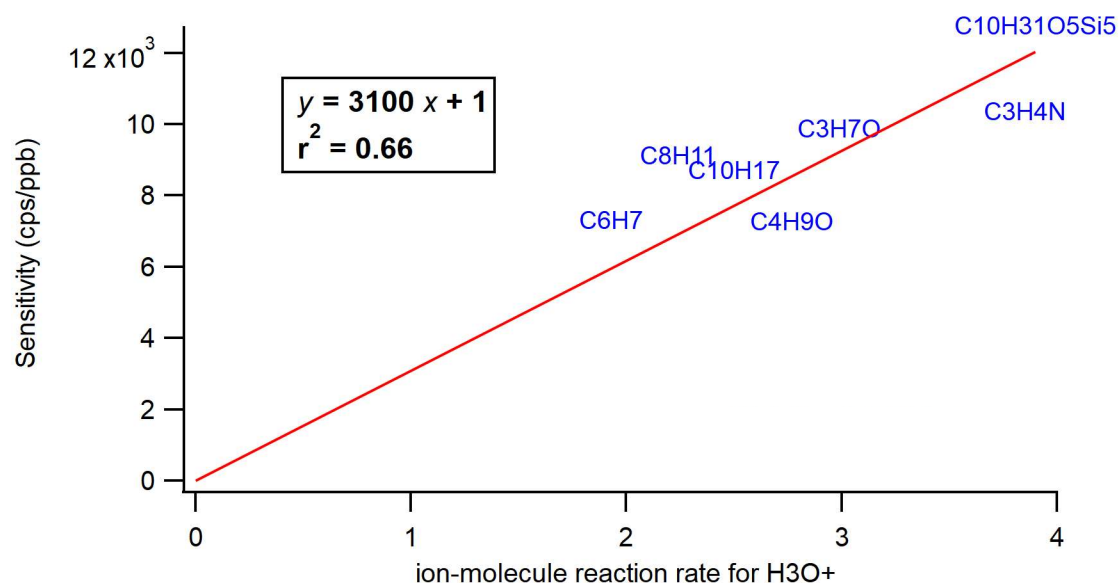

Figure S5: Relationship between explicitly calibrated compounds used in this study and the ion-molecule kinetic capture rate for H<sub>3</sub>O<sup>+</sup> and the target neutral analyte. A linear least squares regression was used to determine the linear relationship shown.

Table S1: A list of the ions presented in the main paper, with assumed and possible structures from previous PTR-MS literature.

| Formula                                      | Detected ion with H <sup>+</sup> (m/z) | Assumed primary structure | Other possible structures                                         |
|----------------------------------------------|----------------------------------------|---------------------------|-------------------------------------------------------------------|
| C <sub>3</sub> H <sub>3</sub> N              | 54                                     | Acrylonitrile             |                                                                   |
| C <sub>3</sub> H <sub>6</sub> O              | 59                                     | Acetone                   | Propanal                                                          |
| C <sub>4</sub> H <sub>6</sub> O              | 71                                     | Methacrolein              | Methyl vinyl ketone, 2-butenal,                                   |
| C <sub>4</sub> H <sub>6</sub> O <sub>2</sub> | 87                                     | Methyl acrylate           | gamma-butyrolactone, cyclopropanecarboxylic acid, 2,3-butanedione |
| C <sub>4</sub> H <sub>8</sub> O              | 73                                     | Butanal                   | 2-butanone, tetrahydrofuran                                       |

|         |     |                          |          |
|---------|-----|--------------------------|----------|
| C5H8O2  | 101 | methyl methacrylate      |          |
| C5H9    | 69  | Cyclopentene             | isoprene |
| C6H6    | 79  | Benzene                  |          |
| C6H10O2 | 115 | ethyl methacrylate       |          |
| C7H12O2 | 129 | propyl methacrylate      |          |
| C8H10   | 107 | C <sub>8</sub> aromatics |          |
| C9H12   | 121 | C <sub>9</sub> aromatics |          |
| C10H17  | 137 | monoterpenes             |          |
